# Supplementary material for: Comparison of ultrafiltration and iron chloride flocculation in the preparation of aquatic viromes from contrasting sample types
Source: PeerJ journal article supplement (doi:10.7717/peerj.11111), 2021-05-05

[bp]

Influent Ultrafiltration  
and Purification

Effluent Ultrafiltration  
and Purification

Effluent Ultrafiltration  
and Purification (T3 Only)

River Water Ultrafiltration  
and Purification

Seawater Ultrafiltration  
and Purification

Influent Flocculation  
and Purification

Effluent Flocculation  
and Purification

River Water Flocculation  
and Purification

Seawater Flocculation  
and Purification

48500

15000

7000

4000

3000

2500

2000

1500

1200

900

600

400

250

100

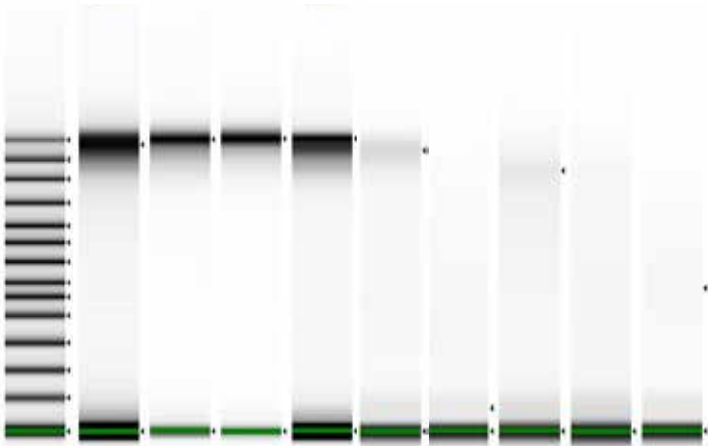

Supplement: Figure_S5.pdf [file Figure_S5.pdf]
