# Supplementary material for: Comparison of ultrafiltration and iron chloride flocculation in the preparation of aquatic viromes from contrasting sample types
Source: PeerJ journal article supplement (doi:10.7717/peerj.11111), 2021-05-05

T3/16S rRNA Ratio

100000  
10000  
1000  
100  
10  
1

Influent

Secondary  
Effluent

T3 Stock

- Chloroform + Chloroform
- Chloroform + DNase
- ▲ Filter + DNase

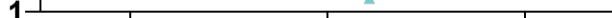

Supplement: FigureS1.pdf [file FigureS1.pdf]
