# Supplementary material for: Comparison of ultrafiltration and iron chloride flocculation in the preparation of aquatic viromes from contrasting sample types
Source: PeerJ journal article supplement (doi:10.7717/peerj.11111), 2021-05-05

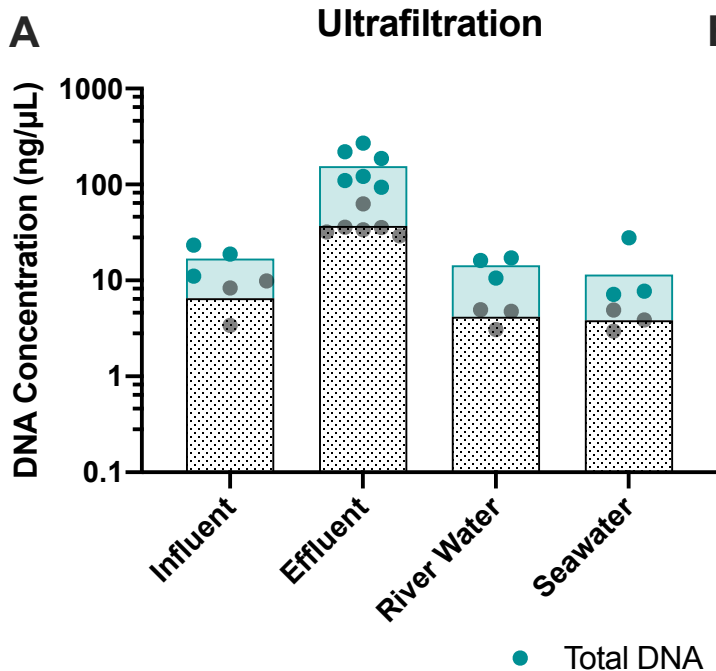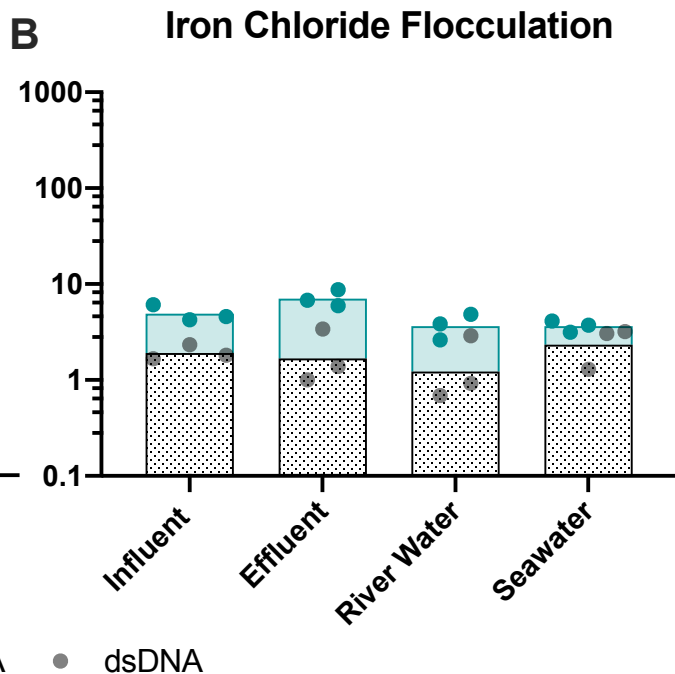

Supplement: FigureS4.pdf [file FigureS4.pdf]
