# Supplementary material for: Comparison of ultrafiltration and iron chloride flocculation in the preparation of aquatic viromes from contrasting sample types
Source: PeerJ. 2021 May 5;9:e11111. doi: 10.7717/peerj.11111 (PMC8106395; doi:10.7717/peerj.11111)
Supplement: Table S1 — *The method for TSS and VSS measurements does not work on high salinity samples, seawater TSS and VSS were unable to be determined. [file peerj-09-11111-s001.xlsx]

## Sheet: Table S1
Matrix	Collection Date	Experiment	pH	Solids Content (mg/L)
				TSS	VSS
Influent	2019-01-03	Jar Test	NA	374	261
	2019-01-08	Jar Test	NA	267	180
	2019-01-21	Jar Test	NA	259	185
	2019-02-15	Viral Purification Optimization	NA	179	109
	2019-05-06	Ultrafiltration and Purification	7.57	287	189
	2019-05-09	Ultrafiltration and Purification	7.57	164	85
	2019-05-23	Ultrafiltration and Purification	7.42	182	92
	2019-06-25	Iron Chloride Flocculation and Purification	7.43	188	122
	2019-06-27	Iron Chloride Flocculation and Purification	7.53	189	108
	2019-07-01	Iron Chloride Flocculation and Purification	7.42	164	98
Secondary Effluent	2018-10-30	Jar Test	NA	NA	NA
	2018-11-06	Jar Test	NA	NA	NA
	2018-12-04	Jar Test	NA	30	16
	2018-12-11	DE UF Optimization	NA	NA	NA
	2019-03-14	Viral Purification Optimization	NA	60.6061	22.7273
	2019-05-16	Ultrafiltration and Purification	6.95	59.7826	19.0217
	2019-05-20	Ultrafiltration and Purification	6.89	72.1154	14.4231
	2019-05-28	Ultrafiltration and Purification	6.98	62.5	16.8269
	2019-06-25	Iron Chloride Flocculation and Purification	7.08	55.2885	16.8269
	2019-06-27	Iron Chloride Flocculation and Purification	7.15	69.6517	9.95025
	2019-07-01	Iron Chloride Flocculation and Purification	7.13	58.4112	16.3551
	2019-10-31	Ultrafiltration and Purification (3 phage)	7.14	45.2261	15.0754
	2019-11-07	Ultrafiltration and Purification (3 phage)	7.07	34.6535	14.8515
	2019-11-14	Ultrafiltration and Purification (3 phage)	7.07	37.3134	12.4378
River Water	2019-05-20	Ultrafiltration and Purification	7.92	75	35
	2019-05-23	Ultrafiltration and Purification	8.03	57.2139	19.9005
	2019-05-28	Ultrafiltration and Purification	7.94	55.5556	14.4928
	2019-05-30	Jar Test	7.9	60.3015	20.1005
	2019-06-11	Jar Test	7.93	72.5	32.5
	2019-06-12	Jar Test	7.87	63.7255	19.6078
	2019-06-25	Iron Chloride Flocculation and Purification	7.96	47.5	10
	2019-06-27	Iron Chloride Flocculation and Purification	8.1	43.3673	10.2041
	2019-07-01	Iron Chloride Flocculation and Purification	8.19	52	20
Shedd Aquarium Seawater	2020-02-27	Jar Test, Ultrafiltration and Purification, Iron Chloride Flocculation and Purification	7.98	*	*
