# Supplementary material for: Comparison of ultrafiltration and iron chloride flocculation in the preparation of aquatic viromes from contrasting sample types
Source: PeerJ. 2021 May 5;9:e11111. doi: 10.7717/peerj.11111 (PMC8106395; doi:10.7717/peerj.11111)
Supplement: Table S12 — *Phage identity does not factor into the [16S rRNA]_Step/[16S rRNA]_Initial calculation, therefore all ratios are the same for a specific matrix. [file peerj-09-11111-s012.xlsx]

## Sheet: Sheet1
Matrix	Phage	Step	Geometric Mean (95% CI)
			[Phage]Step/[Phage]Initial	Recovery (%)	[16S rRNA]Step/[16S rRNA]Initial	Phage Enrichment
Influent	T3	After 0.45-µm filter and iron chloride flocculation	26.89 (16.13-44.85)	69.36 (41.08-117.1)	0.032 (0.019-0.053)	842.9 (411.6-1726)
		After 0.45-µm filter and chloroform	20.12 (11.93-33.94)	51.88 (31.41-85.69)	0.033 (0.029-0.037)	615.7 (354.3-1070)
		After DNase	7.61 (4.75-12.20)	24.94 (16.21-38.35)	0.0064 (0.0018-0.0227)	1043 (678.5-1603)
Effluent	T3	After 0.45-µm filter and iron chloride flocculation	30.61 (20.88-44.89)	77.60 (52.28-115.2)	0.743 (0.429-1.29)	41.18 (29.04-58.40)
		After 0.45-µm filter and chloroform	24.23 (9.10-64.49)	61.44 (23.03-163.9)	0.491 (0.133-1.82)	49.35 (35.32-68.96)
		After DNase	6.66 (1.49-29.81)	21.42 (4.66-98.46)	0.152 (0.030-0.757)	43.89 (25.83-74.59)
River Water	T3	After 0.45-µm filter and iron chloride flocculation	31.35 (11.02-89.21)	80.36 (28.96-223)	2.64 (0.313-22.31)	11.87 (1.51-93.35)
		After 0.45-µm filter and chloroform	20.14 (4.73-85.84)	51.56 (12.70-209.3)	1.55 (0.113-21.07)	13.04 (2.89-58.71)
		After DNase	7.60 (1.94-29.79)	24.69 (6.62-92.07)	0.393 (0.031-4.98)	19.37 (5.29-70.88)
Seawater	HS2	After 0.45-µm filter and iron chloride flocculation	135.0 (128.4-142.0)	62.91 (59.97-65.99)	112.9 (64.72-197.0)	0.836 (0.472-1.48)
		After 0.45-µm filter and chloroform	126.7 (100.8-159.1)	59.02 (47.15-73.87)	115.1 (62.00-213.8)	0.910 (0.470-1.76)
		After DNase	24.67 (21.96-27.71)	14.58 (12.96-16.39)	2.82 (0.854-9.31)	8.75 (2.52-29.23)
	HM1	After 0.45-µm filter and iron chloride flocculation	138.2 (95.10-200.8)	64.4 (44.47-93.28)	NA*	1.22 (0.534-2.81)
		After 0.45-µm filter and chloroform	180.1 (175.8-184.5)	83.93 (81.67-86.26)	NA*	1.57 (0.860-2.85)
		After DNase	47.83 (39.52-57.89)	28.27 (23.35-34.21)	NA*	16.97 (4.47-64.40)
	ICBM5	After 0.45-µm filter and iron chloride flocculation	122.4 (105.7-141.6)	57.01 (49.12-66.18)	NA*	1.08 (0.633-1.85)
		After 0.45-µm filter and chloroform	87.45 (47.94-159.5)	40.75 (22.31-74.45)	NA*	0.760 (0.336-1.72)
		After DNase	3.69 (2.30-5.94)	2.18 (1.35-3.52)	NA*	1.31 (0.540-3.18)
