# Supplementary material for: Comparison of ultrafiltration and iron chloride flocculation in the preparation of aquatic viromes from contrasting sample types
Source: PeerJ. 2021 May 5;9:e11111. doi: 10.7717/peerj.11111 (PMC8106395; doi:10.7717/peerj.11111)
Supplement: Table S13 — *Phage identity does not factor into the [16S rRNA]_Step/[16S rRNA]_Initial calculation, therefore all concentration factors are the same for a specific matrix. [file peerj-09-11111-s013.xlsx]

## Sheet: Table S13
Matrix	Phage	Step	Geometric Mean (95% CI)
			[Phage]Step/[Phage]Initial	Recovery (%)	[16S rRNA]Step/[16S rRNA]Initial	Phage Enrichment
Influent	T3	After 0.45-µm filter and tangential ultrafiltration	25.19 (19.44-32.63)	82.16 (67.41-100.1)	0.413 (0.042-4.04)	60.96 (7.34-506.7)
		After 0.45-µm filter and chloroform	23.28 (12.90-42.02)	75.90 (39.05-147.6)	0.013 (0.0061-0.026)	1850 (564.8-6059)
		After dead-end ultrafiltration	301.1 (116.3-779.8)	50.49 (18.1-140.8)	0.116 (0.049-0.277)	2591 (883.4-7598)
		After DNase	220.8 (116.5-418.5)	47.02 (23.80-92.89)	0.062 (0.016-0.234)	3567 (1476-8619)
Effluent	T3	After 0.45-µm filter and tangential ultrafiltration	46.89 (36.81-59.73)	73.55 (65.23-82.94)	1.78 (0.719-4.43)	26.27 (10.83-63.69)
		After 0.45-µm filter and chloroform	47.83 (34.93-65.49)	75.01 (56.79-99.06)	0.779 (0.362-1.68)	61.38 (34.85-108.1)
		After dead-end ultrafiltration	508.9 (428.0-605.2)	38.57 (27.76-53.58)	6.47 (2.59-16.17)	78.61 (34.61-178.6)
		After DNase	441.1 (358.8-542.2)	42.34 (36.96-48.51)	6.31 (2.99-13.32)	69.88 (32.18-151.7)
	T4	After 0.45-µm filter and tangential ultrafiltration	24.38 (14.86-40.01)	35.71 (25.54-49.91)	NA*	25.31 (6.04-106.1)
		After 0.45-µm filter and chloroform	23.72 (10.50-53.55)	34.73 (18.68-64.55)	NA*	49.68 (20.06-123.1)
		After dead-end ultrafiltration	204.7 (120.8-346.9)	13.78 (6.03-31.52)	NA*	59.56 (53.98-65.71)
		After DNase	197.8 (71.15-549.9)	16.89 (9.55-29.86)	NA*	53.60 (49.71-57.80)
	PhiX174	After 0.45-µm filter and tangential ultrafiltration	39.99 (17.25-92.68)	58.56 (35.04-97.88)	NA*	41.52 (14.19-121.5)
		After 0.45-µm filter and chloroform	32.43 (16.41-64.08)	47.49 (26.05-86.61)	NA*	67.95 (25.84-178.7)
		After dead-end ultrafiltration	230.9 (114.4-466.0)	15.55 (4.50-53.74)	NA*	67.19 (38.12-118.4)
		After DNase	44.58 (19.80-100.4)	3.81 (2.74-5.29)	NA*	12.08 (9.38-15.57)
River Water	T3	After 0.45-µm filter and tangential ultrafiltration	40.33 (32.04-50.76)	67.49 (55.38-82.24)	3.09 (2.21-4.33)	13.03 (8.31-20.44)
		After 0.45-µm filter and chloroform	36.91 (18.59-73.28)	61.83 (31.96-119.6)	2.24 (0.720-6.95)	16.51 (5.82-46.88)
		After dead-end ultrafiltration	654.9 (359.3-1194)	53.30 (37.23-76.31)	12.19 (9.76-15.21)	53.73 (36.77-78.50)
		After DNase	413.7 (279.2-612.9)	42.87 (38.94-47.19)	0.936 (0.479-1.83)	442.7 (305.8-640.8)
Seawater	HS2	After 0.45-µm filter and tangential ultrafiltration	30.91 (24.60-38.85)	57.02 (48.49-67.04)	4.21 (1.43-12.44)	7.34 (3.11-17.28)
		After 0.45-µm filter and chloroform	22.90 (13.68-38.33)	42.24 (27.10-65.84)	2.44 (0.894-6.65)	9.39 (5.74-15.39)
		After dead-end ultrafiltration	160.3 (112.5-228.5)	14.83 (9.67-22.73)	1.22 (0.055-27.06)	131.3 (7.48-2303)
		After DNase	149.9 (50.30-446.8)	17.59 (5.34-57.93)	1.60 (0.503-5.11)	93.59 (48.29-181.4)
	HM1	After 0.45-µm filter and tangential ultrafiltration	35.90 (30.05-42.89)	66.23 (56.58-77.51)	NA*	8.52 (3.43-21.19)
		After 0.45-µm filter and chloroform	23.81 (20.37-27.83)	43.92 (41.40-46.60)	NA*	9.77 (3.98-24.00)
		After dead-end ultrafiltration	215.7 (155.9-298.4)	19.94 (12.89-30.83)	NA*	176.5 (10.88-2864)
		After DNase	252.0 (74.96-847.4)	29.55 (7.95-109.9)	NA*	157.2 (79.49-310.8)
	ICBM5	After 0.45-µm filter and tangential ultrafiltration	25.66 (20.23-32.55)	47.34 (41.11-54.50)	NA*	6.09 (2.35-15.82)
		After 0.45-µm filter and chloroform	20.63 (12.93-32.89)	38.05 (23.96-60.43)	NA*	8.46 (4.23-16.94)
		After dead-end ultrafiltration	347.4 (150.9-799.6)	32.11 (14.24-72.39)	NA*	284.3 (11.59-6974)
		After DNase	108.9 (54.85-216.1)	12.76 (5.74-28.40)	NA*	67.90 (29.18-158.0)
