# Supplementary material for: Comparison of ultrafiltration and iron chloride flocculation in the preparation of aquatic viromes from contrasting sample types
Source: PeerJ. 2021 May 5;9:e11111. doi: 10.7717/peerj.11111 (PMC8106395; doi:10.7717/peerj.11111)
Supplement: Table S14 — A significant stepwise reduction in recovery or change in enrichment was assessed with p-values from ANOVA analysis with Tukey’s correction for multiple comparisons with p-values less than 0.05 bolded. [file peerj-09-11111-s014.xlsx]

## Sheet: Table S14
Matrix	Phage	Step	Recovery (%)		Phage Enrichment
			Stepwise Geometric Mean	Stepwise p-value	Stepwise Geometric Mean	Stepwise p-value
Influent	T3	After 0.45-µm filter and iron chloride flocculation	69.36	0.0218	840	0.00076
		After 0.45-µm filter and chloroform	74.7982	0.178	0.730454	0.326
		After DNase	35.9573	0.0322	1.69401	0.0452
Effluent	T3	After 0.45-µm filter and iron chloride flocculation	77.6	0.349	41.18	0.000301
		After 0.45-µm filter and chloroform	79.1753	0.684	1.1984	0.463
		After DNase	34.8633	0.0461	0.889362	0.78
River Water	T3	After 0.45-µm filter and iron chloride flocculation	80.36	0.889	11.87	0.332
		After 0.45-µm filter and chloroform	64.1613	0.575	1.09857	1
		After DNase	47.886	0.492	1.48543	0.841
Seawater	HS2	After 0.45-µm filter and iron chloride flocculation	62.91	<1E-06	0.836	0.99995
		After 0.45-µm filter and chloroform	93.8166	0.731	1.08852	0.999992
		After DNase	24.7035	<1E-06	9.61538	0.0274
	HM1	After 0.45-µm filter and iron chloride flocculation	64.4	<1E-06	1.22	0.9997
		After 0.45-µm filter and chloroform	130.326	0.000115	1.28689	0.9995
		After DNase	33.6828	<1E-06	10.8089	1.6e-05
	ICBM5	After 0.45-µm filter and iron chloride flocculation	57.01	<1E-06	1.08	0.99998
		After 0.45-µm filter and chloroform	71.4787	0.00131	0.703704	0.9995
		After DNase	5.34969	<1E-06	1.72368	0.997
