# Supplementary material for: Comparison of ultrafiltration and iron chloride flocculation in the preparation of aquatic viromes from contrasting sample types
Source: PeerJ. 2021 May 5;9:e11111. doi: 10.7717/peerj.11111 (PMC8106395; doi:10.7717/peerj.11111)
Supplement: Table S15 — A significant stepwise reduction in recovery or change in enrichment was assessed with p-values from ANOVA analysis with Tukey’s correction for multiple comparisons with p-values less than 0.05 bolded. [file peerj-09-11111-s015.xlsx]

## Sheet: Table S15
Matrix	Phage	Step	Recovery (%)		Phage Enrichment
			Stepwise Geometric Mean	Stepwise p-value	Stepwise Geometric Mean	Stepwise p-value
Influent	T3	After 0.45-µm filter and tangential ultrafiltration	82.16	0.578	60.96	0.99996
		After 0.45-µm filter and chloroform	92.3807	0.994	30.3478	0.103
		After dead-end ultrafiltration	66.5217	0.303	1.40054	0.799
		After DNase	93.1274	0.99	1.37669	0.634
Effluent	T3	After 0.45-µm filter and tangential ultrafiltration	73.55	0.000278	26.27	0.366
		After 0.45-µm filter and chloroform	101.985	0.977	2.33651	0.419
		After dead-end ultrafiltration	51.4198	<1E-06	1.28071	0.564
		After DNase	107	0.991	0.888945	0.948
	T4	After 0.45-µm filter and tangential ultrafiltration	35.71	<1E-06	25.31	0.846
		After 0.45-µm filter and chloroform	97.2557	0.999997	1.96286	0.908
		After dead-end ultrafiltration	39.6775	0.0757	1.19887	0.999
		After DNase	122.569	0.996	0.899933	0.999
	PhiX174	After 0.45-µm filter and tangential ultrafiltration	58.56	5.9e-05	41.52	0.503
		After 0.45-µm filter and chloroform	81.0963	0.645	1.63656	0.852
		After dead-end ultrafiltration	32.7437	0.00218	0.988815	0.99995
		After DNase	24.5016	0.481	0.179789	0.247
River Water	T3	After 0.45-µm filter and tangential ultrafiltration	67.49	0.00628	13.03	0.987
		After 0.45-µm filter and chloroform	91.6136	0.968	1.26708	0.9998
		After dead-end ultrafiltration	86.2041	0.65	3.25439	0.609
		After DNase	80.4315	0.558	8.23934	<1E-06
Seawater	HS2	After 0.45-µm filter and tangential ultrafiltration	57.02	<1E-06	7.34	1
		After 0.45-µm filter and chloroform	74.0793	0.0762	1.27929	1
		After dead-end ultrafiltration	35.1089	0.000118	13.983	0.723
		After DNase	118.611	0.943	0.712795	0.954
	HM1	After 0.45-µm filter and tangential ultrafiltration	66.23	5e-06	8.52	0.999998
		After 0.45-µm filter and chloroform	66.3144	0.00187	1.14671	1
		After dead-end ultrafiltration	45.4007	0.000912	18.0655	0.484
		After DNase	148.195	0.174	0.890652	0.958
	ICBM5	After 0.45-µm filter and tangential ultrafiltration	47.34	<1E-06	6.09	1
		After 0.45-µm filter and chloroform	80.376	0.466	1.38916	1
		After dead-end ultrafiltration	84.389	0.857	33.6052	0.0269
		After DNase	39.7384	0.00601	0.238832	0.0661
